# Supplementary material
Source: Springer Nature journal article supplement (https://www.springermedizin.de/resource/supplementary/12986_2007_135_MOESM6_ESM.pdf/25655438)

### EXFS

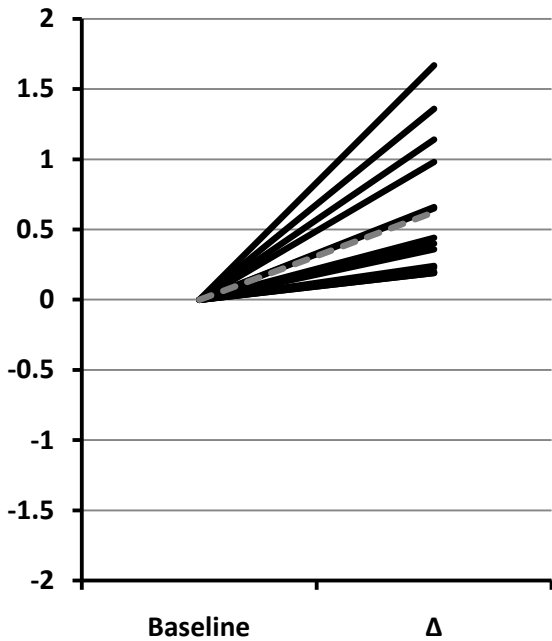

### EX

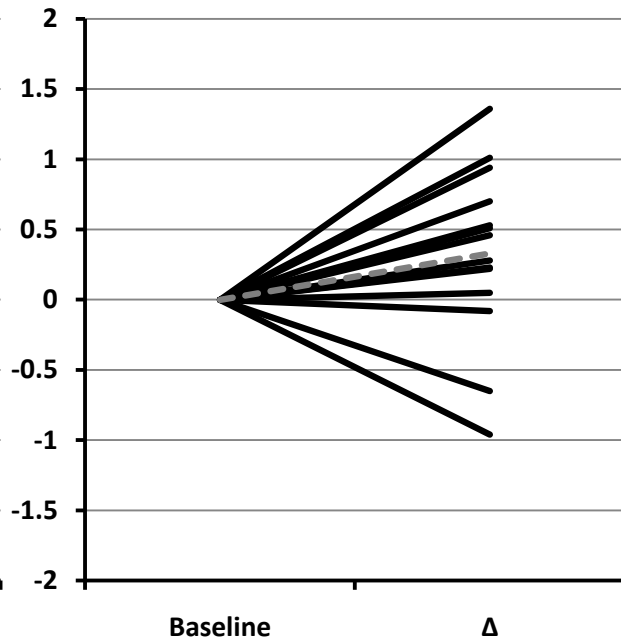

### CON

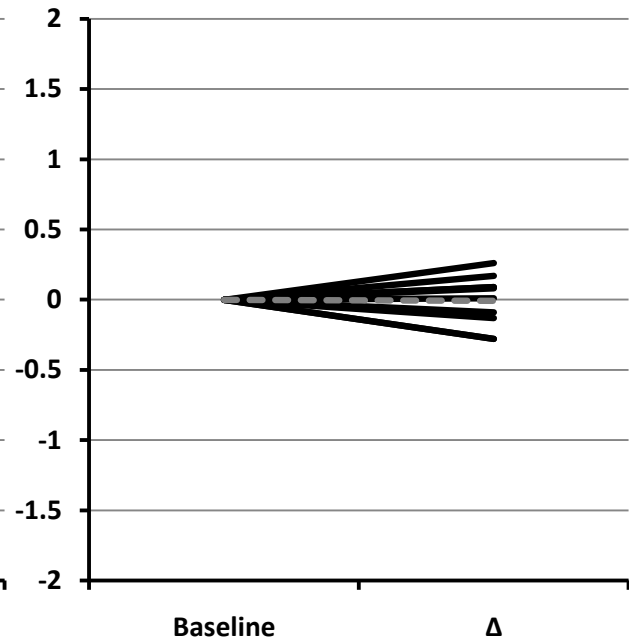

Supplement: MOESM6 [file 25655438]
